# Supplementary material for: Inequalities In Caries Among Pre-School Italian Children With Different Background
Source: Research Square preprint supplement (doi:10.21203/rs.3.rs-1117983/v1), 2021-12-02
Supplement: Supplementary file 1 [file 2d17dd80faee484adf2f6eaf.docx]

**Table 2S. Multivariate regression coefficients of caries prevalence.**

*Taking into consideration of the different caries prevalence in the two population (42.61 % in European children and 72.59% in children with not-European background), it was decided to run a Zero-inflated negative binomial logistic model with European background children and a logistic model in non-European children.*

**European background**

*Number of observations = 5,942*

*Caries observations (Non-zero observations)=2,473*

*Caries-free observations (Zero observations)=3,469*

*Log likelihood = -3932.83 Likelihood Ratio 2(5)=1032.19 p<0.01*

| **Covariate** | **IRR±Std.Err. (p-value)** | **95%CI** |
| --- | --- | --- |
| Breastfeeding *(>6≤12 months)* | *1.16±0.02 (<0.01)* | *1.12 / 1.19* |
| Pacifier at night *(No)* | *1.21±0.06 (<0.01)* | *0.09 / 1.34* |
| Brushing frequency *(> twice a day)* | *0.67±0.03 (<0.01)* | *0.61 / 0.73* |
| Cariogenic diet *(No)* | *2.05±0.11 (<0.01)* | *1.84 / 2.29* |
| Smoking habit *(No)* | *1.81±0.08 (<0.01)* | *1.65 / 1.98* |
| constant | *0.27±0.03 (<0.01)* | *0.22 / 0.33* |
| *Inflate*  *Sex* | *19.00±6.68 (1.00)* | *-1.34 / 1.34* |
| Sex (Female) Constant | *-38.75±6.69 (1.00)* | *-1.34 / 1.34* |
| *Natural log of alpha* | *-24.84±81.03 (0.76)* | *-183.64 / 133.97* |

*IRR=Coefficients of the Zero-inflated negative binomial logistic model transformed to incidence-rate ratios*

*constant= The zero negative binomial regression estimate;*

*alpha= The estimate of the dispersion parameter.*

*constant= The zero negative binomial regression estimate;*

*alpha= The estimate of the dispersion parameter.*

**Non-European background**

*Number of observations = 883*

*Log likelihood = -468.65 Likelihood Ratio 2(5)=99.80 p<0.01*

| **Covariate** | **Odds Ratio ±Std.Dev (p-value)** | **95%CI** |
| --- | --- | --- |
| Breastfeeding *(>6≤12 months)* | *0.32±0.04 (<0.01)* | *0.24 / 0.43* |
| Pacifier at night *(No)* | *2.40±2.75 (0.44)* | *0.25 / 22.64* |
| Brushing frequency *(> twice a day)* | *omitted* | *----* |
| Cariogenic diet *(No)* | *0.60±0.16 (0.06)* | *0.35 /1.02* |
| Smoking habit *(No)* | *0.15±0.06 (<0.01)* | *0.07 / 0.92* |
| Constant | *9.67±4.21 (<0.01)* | *4.11 / 22.72* |
